# Supplementary material
Source: HighWire-hosted journal article supplement (https://ajnr-sso.highwirestaging.com/highwire/filestream/62977/field_highwire_adjunct_files/0/18-00552.pdf)
Supplement: 18-00552.pdf [file 18-00552.pdf]

On-line Table: Summary of study results

| Procedure No.<br>(Patient No.) | Instrumented<br>Segment<br>(Implants) | Level (No.) of<br>Augmented<br>Screws | Level (No.) of<br>Augmented Cage<br>Subsidence | Level (No.) of<br>Augmented Vertebral<br>Fracture | PGIC    | Revision<br>Surgery | FU<br>(mo) |
|--------------------------------|---------------------------------------|---------------------------------------|------------------------------------------------|---------------------------------------------------|---------|---------------------|------------|
| 1 (1)                          | T11-L3 (BS + CC)                      | L (2)                                 | T (1), L (1)                                   | NJ T (1)                                          | 7       | N                   | 16         |
| 2 (2)                          | T10-S1 (BS)                           | S (2)                                 |                                                |                                                   | 5       | N                   | 9          |
| 3 (2)                          | T10-S1 (BS)                           |                                       |                                                | J T (1)                                           | 5       | N                   | 4          |
| 4 (3)                          | L3-S1 (BS)                            | S (1)                                 |                                                |                                                   | 5       | N                   | 3          |
| 5 (4)                          | T11-L5 (BS)                           | T (1), L (2)                          |                                                | NJ T (1)                                          | 6       | N                   | 50         |
| 6 (5)                          | T11-L4 (BS + IC)                      | T (2)                                 |                                                | NJ L (1)                                          | 5       | Y                   | 36         |
| 7 (6)                          | T10-L2 (BS)                           |                                       |                                                | NJ T (1)                                          | 7       | N                   | 20         |
| 8 (7)                          | T4-T11 (BS + CC)                      | T (2)                                 | T (2)                                          |                                                   | 6       | N                   | 9          |
| 9 (8)                          | T5-S1 (BS + IC)                       | T (2)                                 |                                                | NJ T (1)                                          | 5       | N                   | 9          |
| 10 (8)                         | T5-S1 (BS + IC)                       | T (2), L (4), S (2), I (2)            | L (2)                                          | NJ T (1)                                          | 3       | Y                   | 13         |
| 11 (9)                         | T11-S1 (BS)                           | T (2)                                 |                                                | J T (1) - NJ T (1)                                | 6       | N                   | 54         |
| 12 (10)                        | T11-S1 (BS + IC)                      | T (3)                                 |                                                | J T (1)                                           | 5       | N                   | 36         |
| 13 (11)                        | T11-S1 (BS)                           | S (2)                                 |                                                |                                                   | 7       | N                   | 24         |
| 14 (12)                        | L2-L4 (BS + CC)                       |                                       | L (1)                                          | J L (1)                                           | 7       | N                   | 5          |
| 15 (13)                        | T11-iliac (BS)                        | I (1)                                 |                                                |                                                   | 7       | N                   | 16         |
| 16 (14)                        | L4-S1 (BS)                            | S (2)                                 |                                                |                                                   | 6       | N                   | 20         |
| 17 (15)                        | L2-S1 (BS + IC)                       | S (2)                                 |                                                |                                                   | 7       | N                   | 20         |
| 18 (16)                        | L2-S1 (BS)                            | Aborted                               |                                                |                                                   | 4       | Y                   | 6          |
| 19 (17)                        | T10-S1 (BS)                           | S (2)                                 |                                                |                                                   | 4       | N                   | 2          |
| 20 (18)                        | T12-L2 (BS)                           |                                       |                                                | J T (1), J L (1)                                  | 7       | N                   | 8          |
| 21 (19)                        | T11-L3 (BS)                           |                                       |                                                | NJ L (1)                                          | 6       | N                   | 26         |
| 22 (20)                        | L2-L5 (BS + IC)                       |                                       |                                                | J L (1)                                           | 6       | N                   | 12         |
| 23 (21)                        | L1-L5 (BS + IC)                       |                                       |                                                | J T (1)                                           | 6       | N                   | 19         |
| 24 (22)                        | T12-L3 (BS)                           |                                       |                                                | NJ T (1)                                          | 7       | N                   | 20         |
| 25 (23)                        | L4-S1 (BS + IC)                       |                                       |                                                | J L (1)                                           | 6       | N                   | 16         |
| 26 (24)                        | T11-L3 (BS)                           |                                       |                                                | NJ T (1)                                          | 7       | N                   | 25         |
| 27 (25)                        | L2-L4 (BS)                            | L (2)                                 |                                                |                                                   | 4       | Y                   | 36         |
| 28 (26)                        | L2-L5 (BS + IC)                       | L (2)                                 |                                                | NJ L (1)                                          | 5       | Y                   | 2          |
| 29 (27)                        | L3-L4 (BS)                            |                                       |                                                | J L (1)                                           | 7       | N                   | 14         |
| 30 (28)                        | T9-L2 (BS)                            |                                       |                                                | J T (1)                                           | 6       | N                   | 6          |
| 31 (29)                        | T11-L1 (BS)                           |                                       |                                                | NJ T (1)                                          | Unknown | Unknown             | LFU        |

**Note:**—BS indicates bars and screws; CC, corpectomy cage; CS, cage subsidence; IC, intersomatic cage; T, thoracic; L, lumbar; S, sacral; I, iliac; J, junctional; NJ, nonjunctional; LFU, lost to follow-up; FU, follow-up; Y, yes; N, no.
